# Supplementary material
Source: publisher figshare collection journal article supplement (https://acs.figshare.com/ndownloader/files/4085365)

## Supporting information for the article entitled

### **$\alpha$ -Diketone Formation Accompanied by Oxidation of Sulfur Functional Group by the Reaction of *o*-Alkynylarenesulfoxide with Iodine**

Shoji Matsumoto,\* Hiroyuki Shibata, and Motohiro Akazome

Department of Applied Chemistry and Biotechnology, Graduate School of Engineering, Chiba University, 1-33  
Yayoicho, Inageku, Chiba 263-8522, Japan

\*Corresponding author: Tel.: +81-43-290-3369; fax: +81-43-290-3401;

E-mail address: smatsumo@faculty.chiba-u.jp

#### Table of Contents:

|                                                                                                        |         |
|--------------------------------------------------------------------------------------------------------|---------|
| 1. $^1\text{H}$ NMR analysis of the reaction of <b>1</b> with $\text{I}_2$ (Figure S1).                | .....S2 |
| 2. Oxidation and disproportionation experiments between <b>2</b> , <b>3</b> , and <b>4</b> (Scheme S1) | .....S2 |
| 3. Plausible reaction mechanisms through intermediate <b>A'</b> (Scheme S2 and S3).                    | .....S3 |
| 4. $^1\text{H}$ and $^{13}\text{C}$ NMR spectra of <b>1</b> , <b>2</b> , <b>3</b> , and <b>4</b> .     | .....S4 |

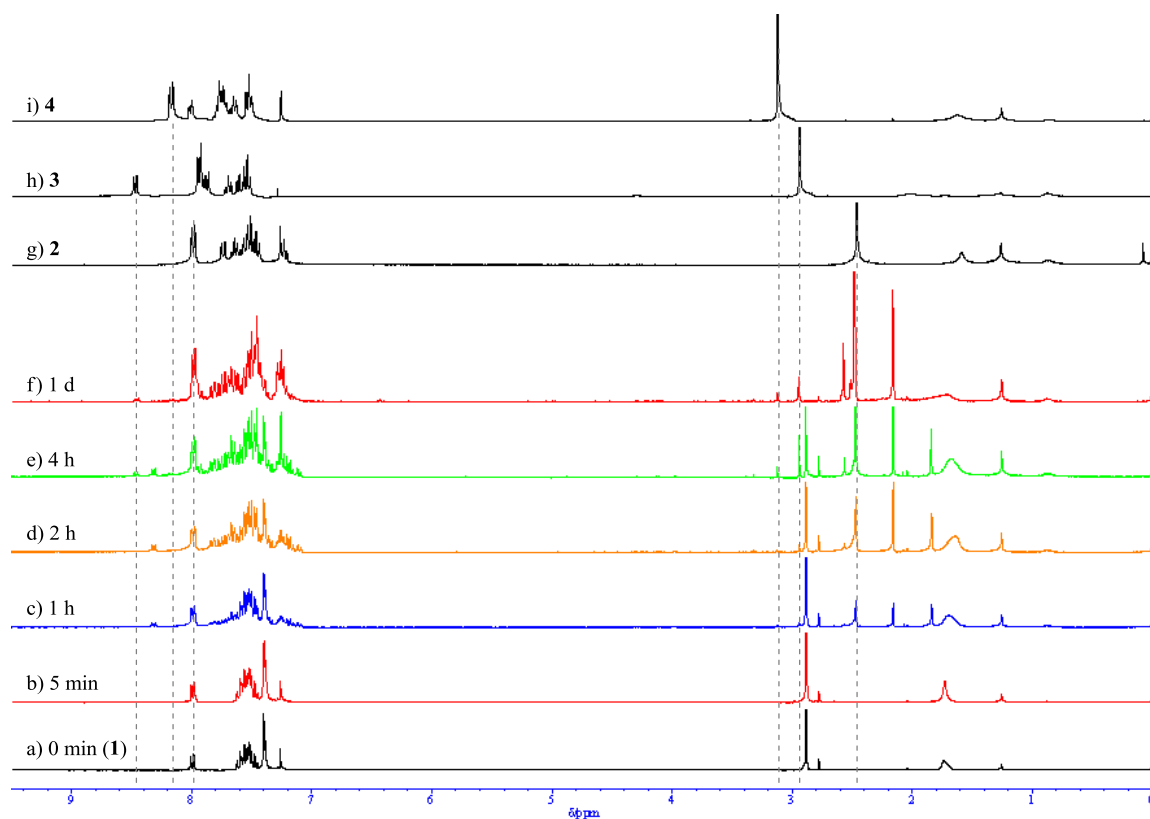

**Figure S1.**  $^1\text{H}$  NMR analysis in the reaction of **1** with  $\text{I}_2$  in  $\text{CDCl}_3$  a) before and after addition of  $\text{I}_2$  for b) 5min, c) 1h, d) 2 h, e) 4h, and f) 1d. The spectra of g) **2**, h) **3**, and i) **4**.

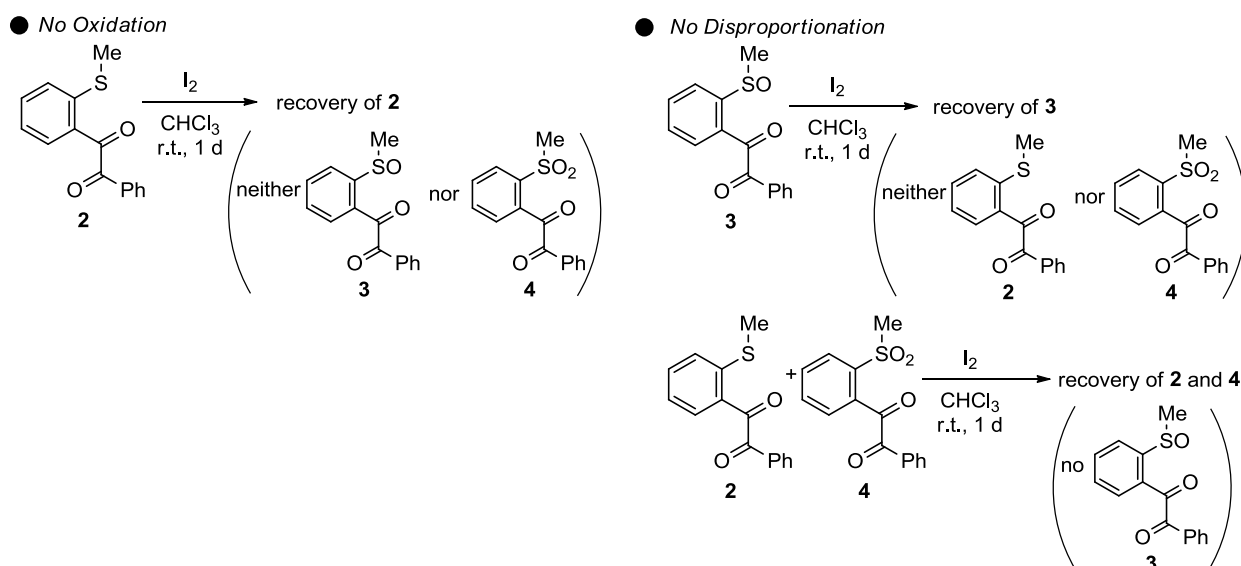

**Scheme S1.** Oxidation Experiment of **2**. And Disproportionation Experiments of **3** and of the Combination of **2** and **4** Under Standard Conditions

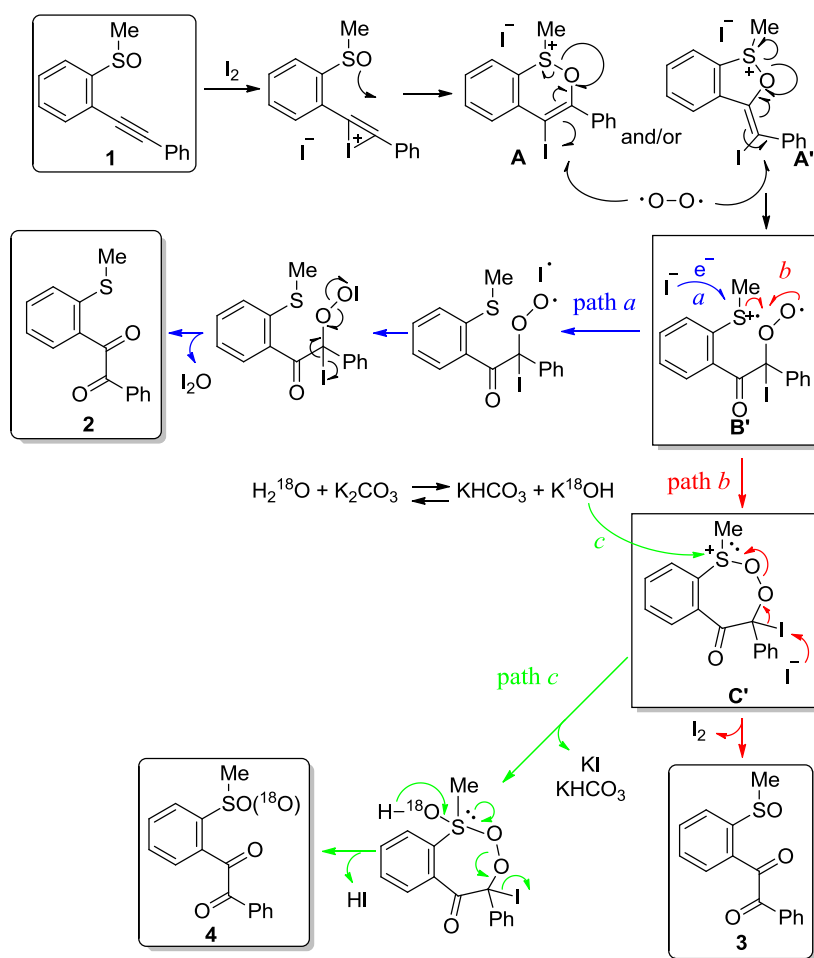

**Scheme S2. Plausible Reaction Mechanism of the Formation of 2, 3, and 4 Through Intermediate A'**

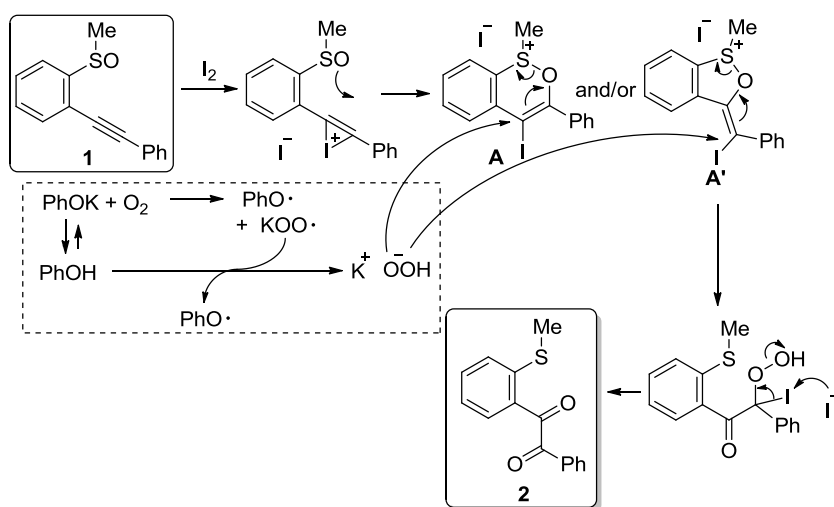

**Scheme S3. Another Reaction Mechanism of the Formation of 2 Through Intermediate A'**

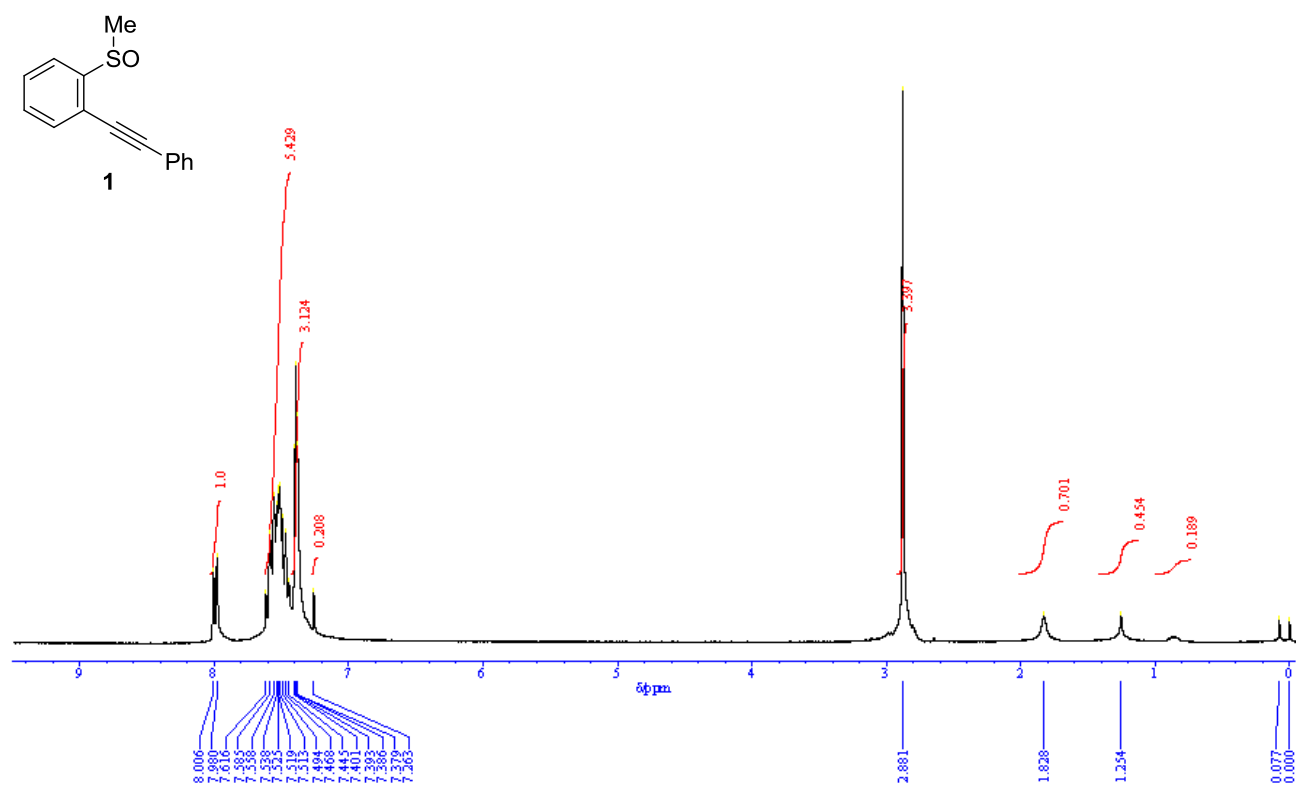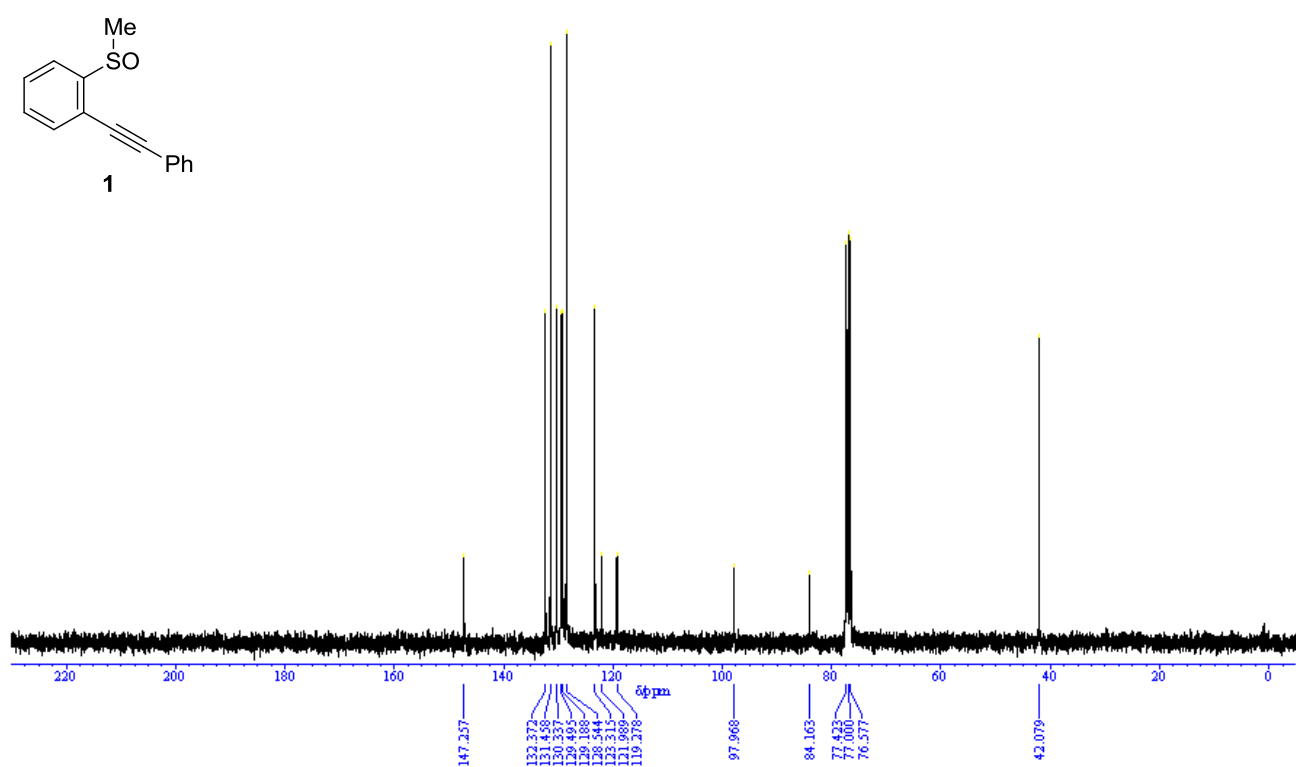

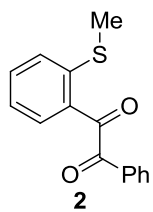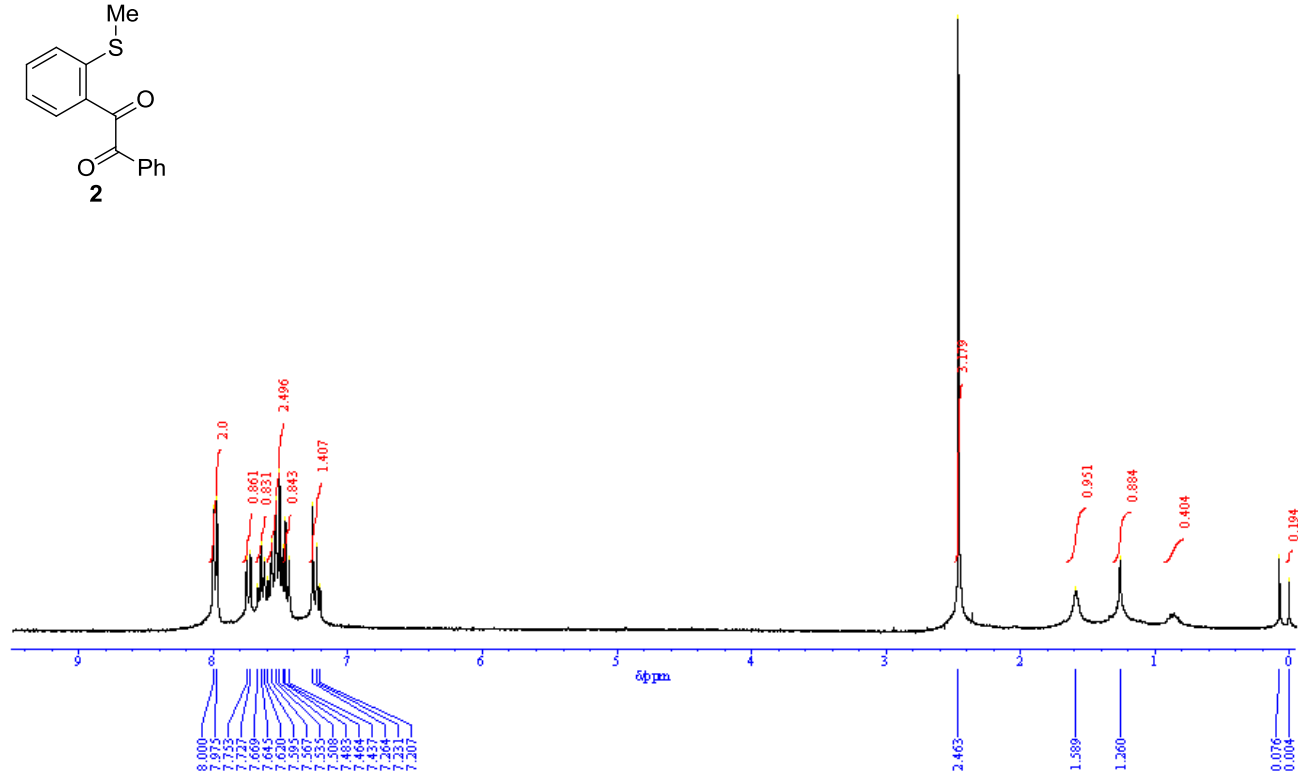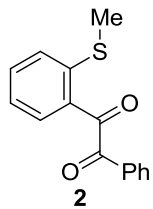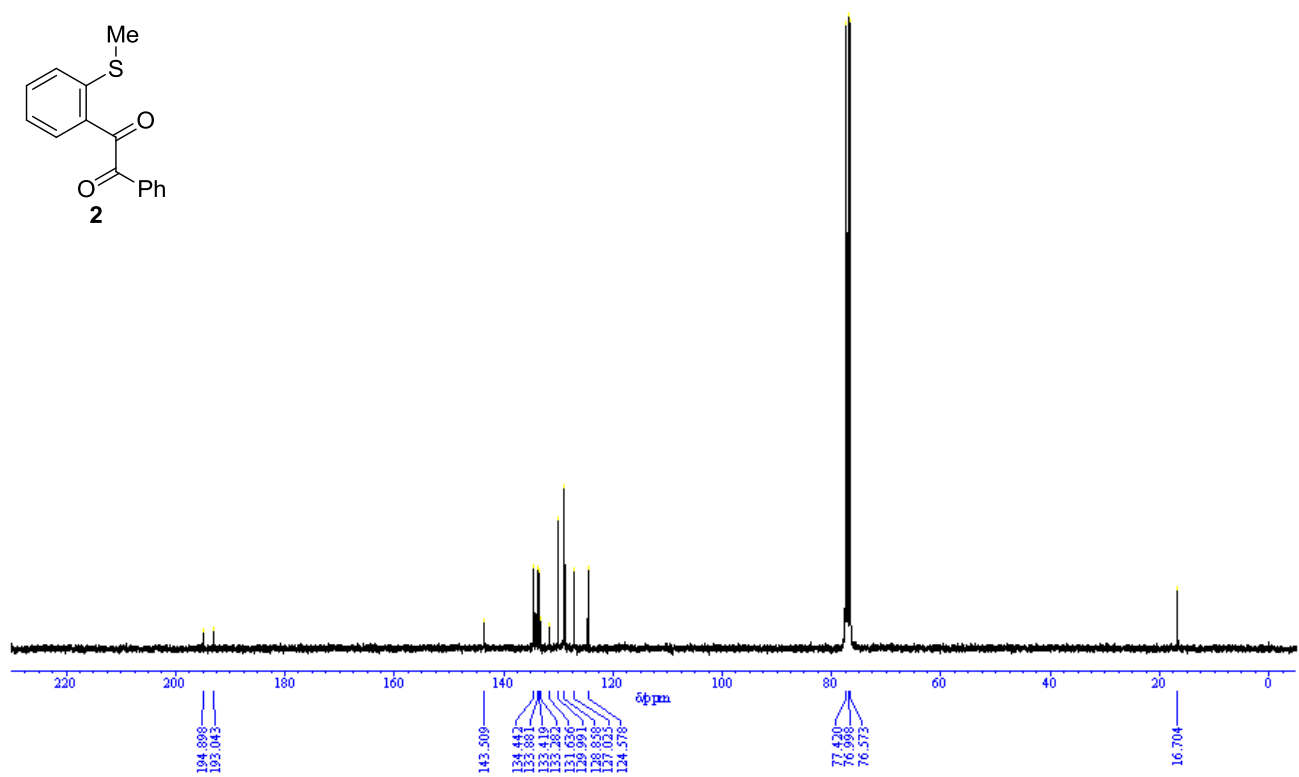

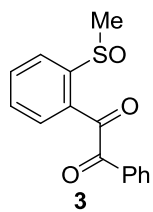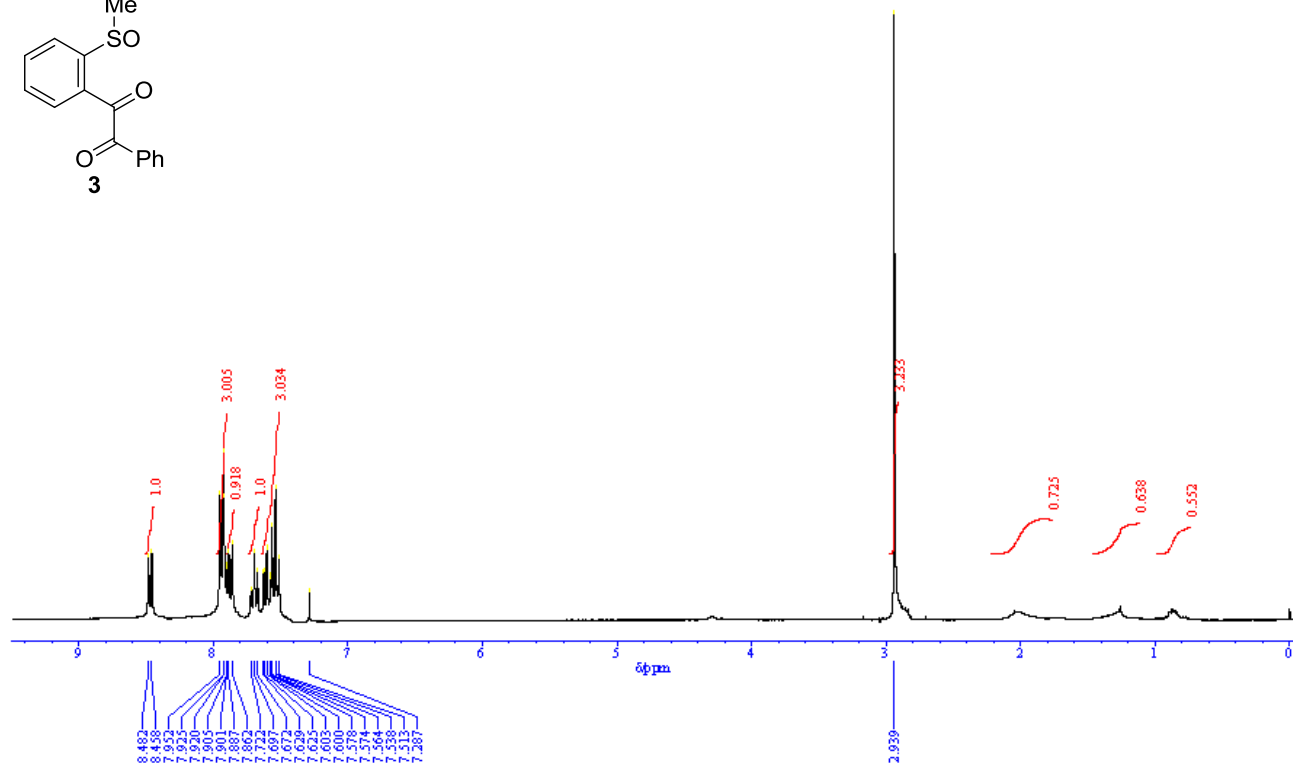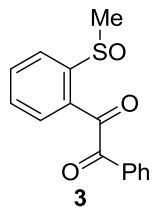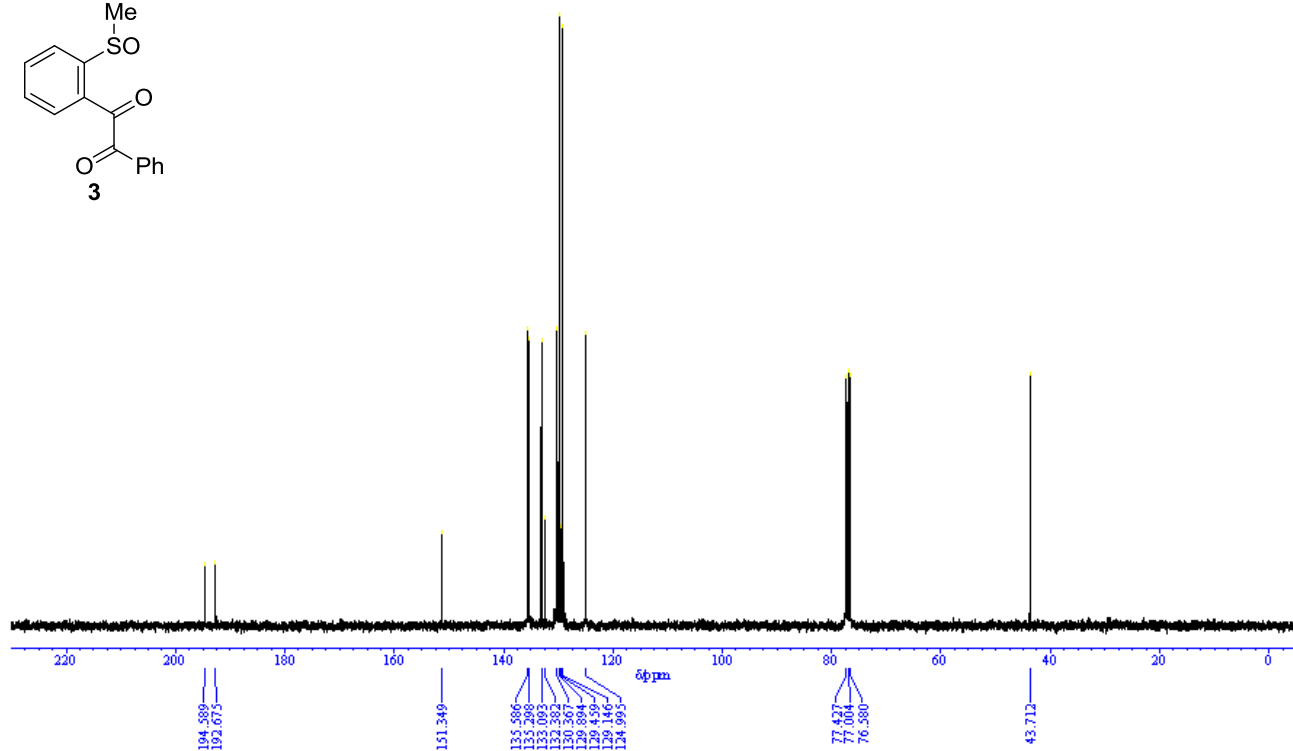

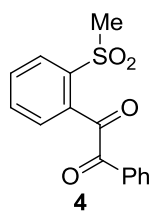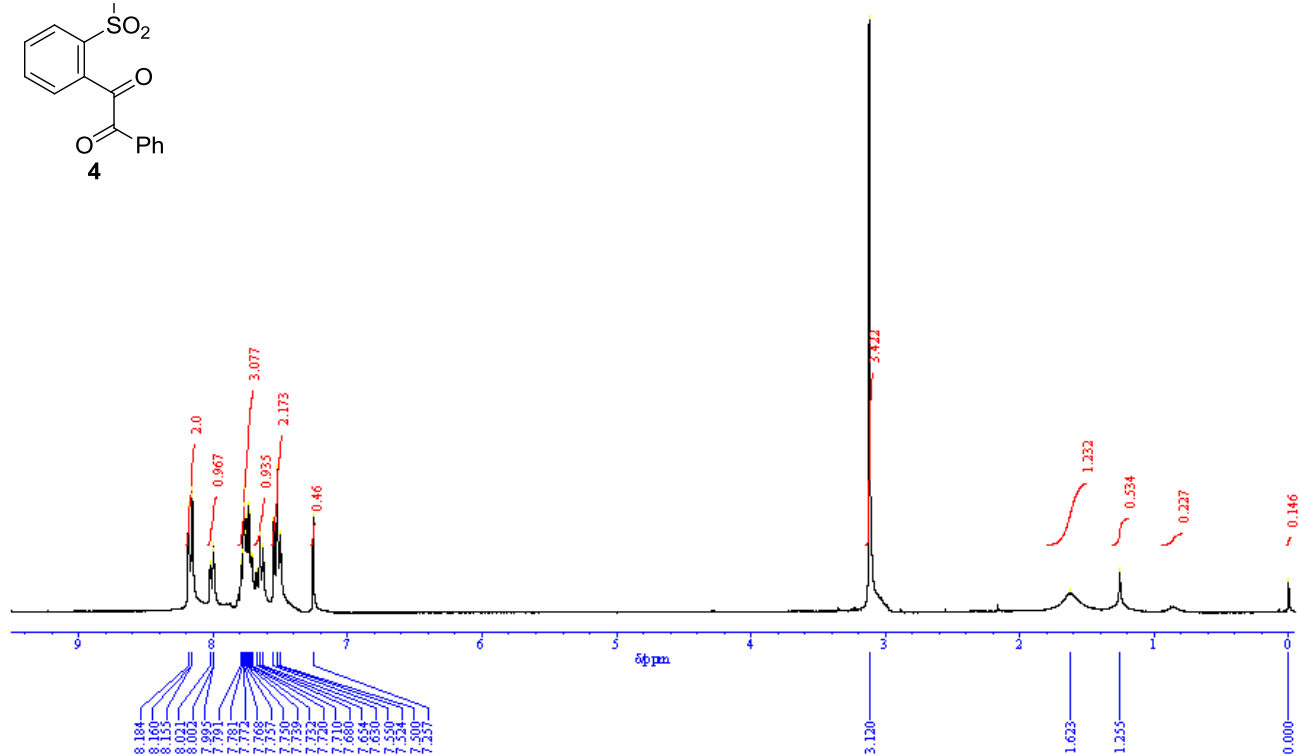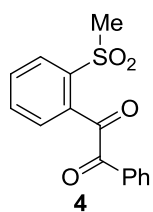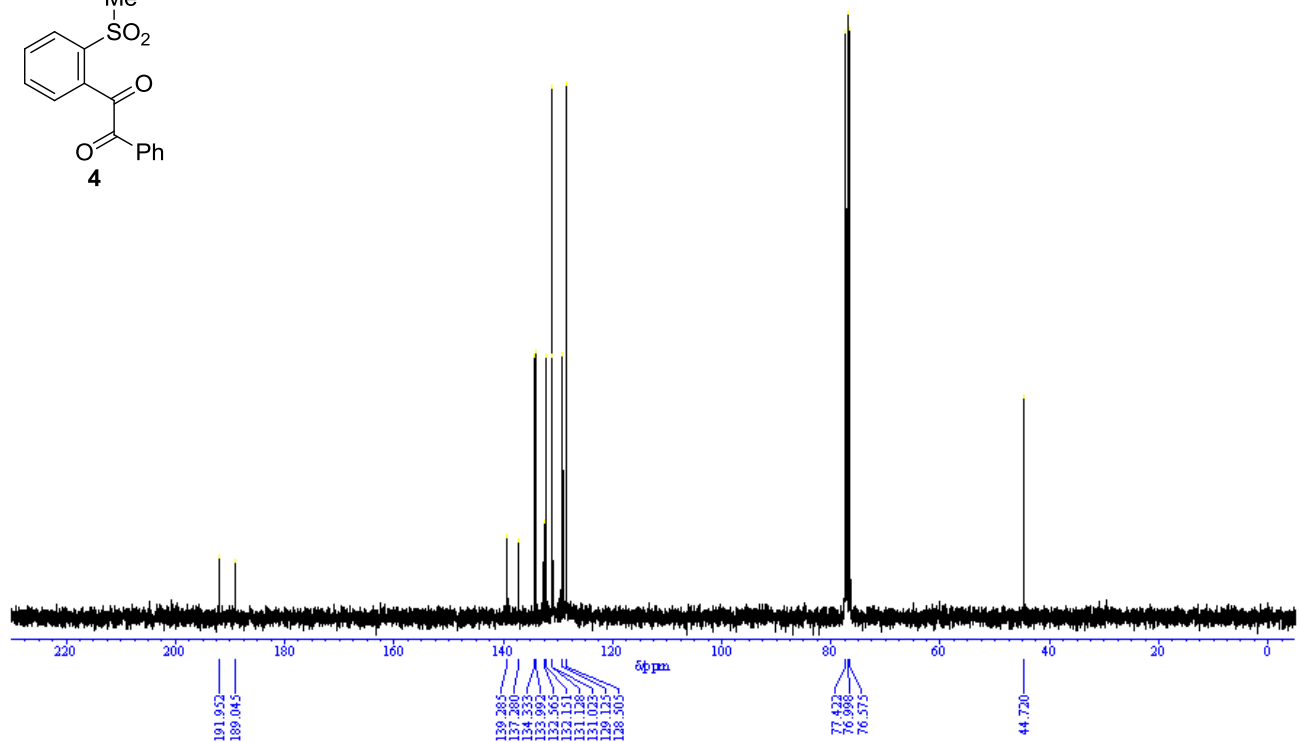

Supplement: Supplementary file 1 [file 4085365]
